# Supplementary material
Source: publisher site journal article supplement (https://www.dovepress.com/get_supplementary_file.php?f=464871.docx)
Supplement: Supplementary file 1 [file get_supplementary_file.php]

**Supplementary Information**

**Figures**


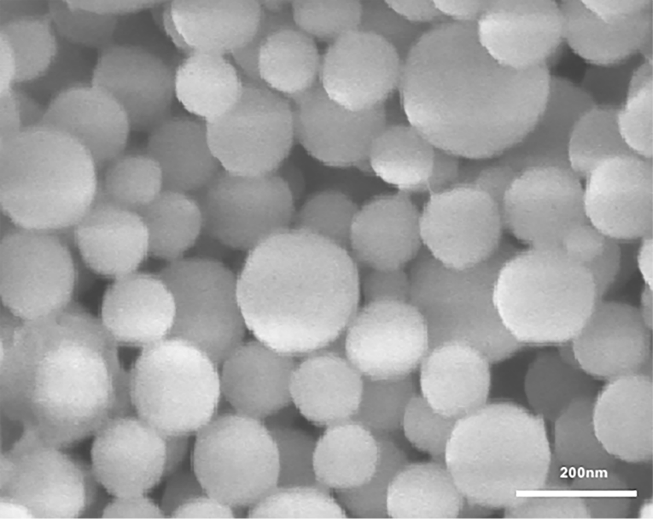


**Figure S1.** SEM image of L-(CaP-ZnP) NPs.


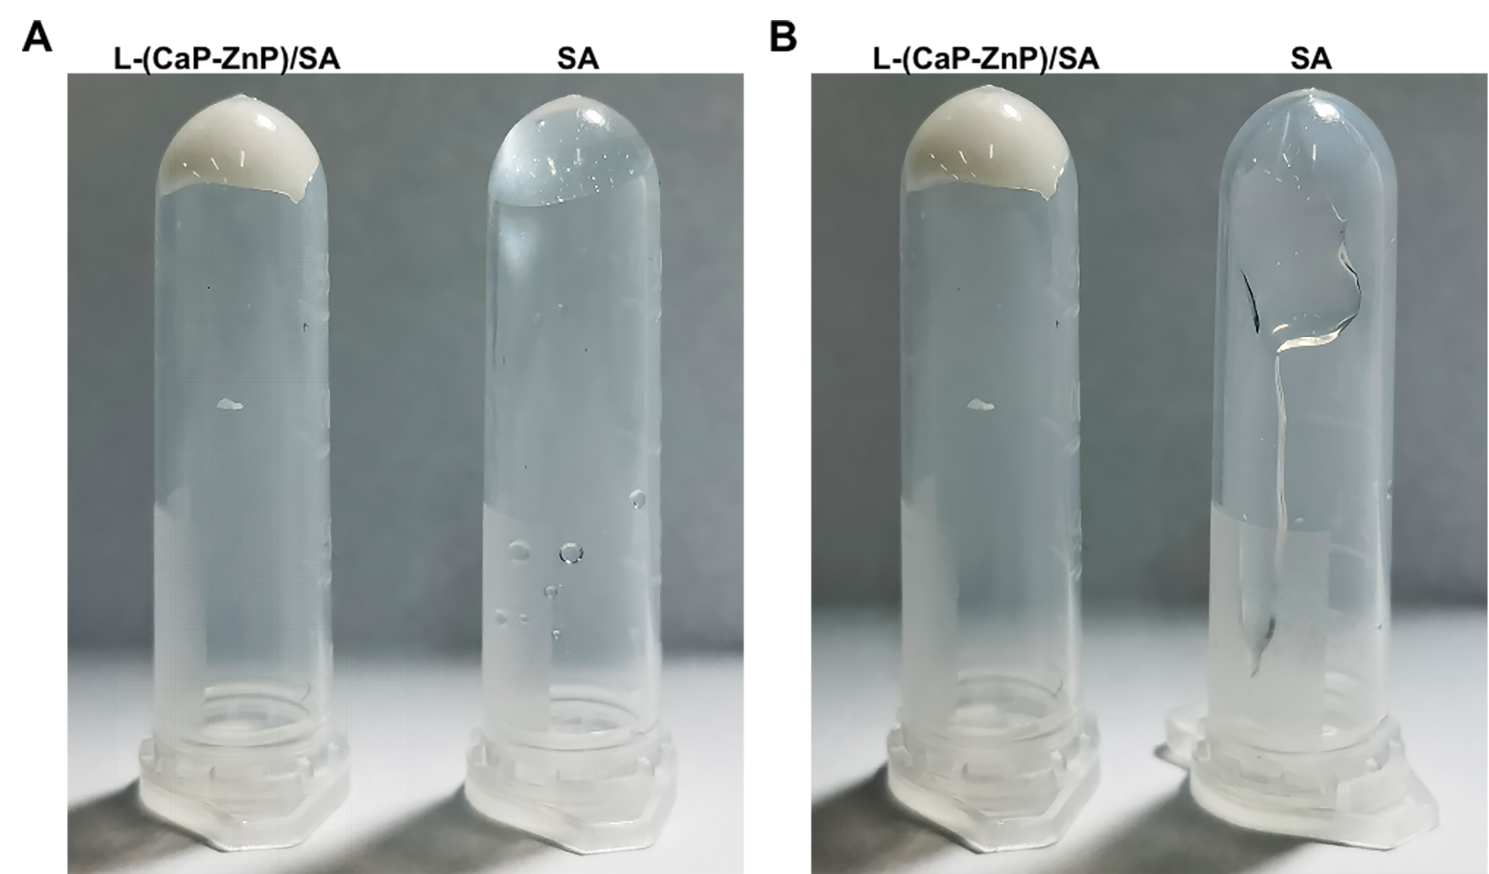


**Figure S2.** The Comparison of Viscosity between L-(CaP-ZnP)/SA nanocomposite hydrogel and SA hydrogel at room temperature. (A) 0 minute (B) After 10 minutes.


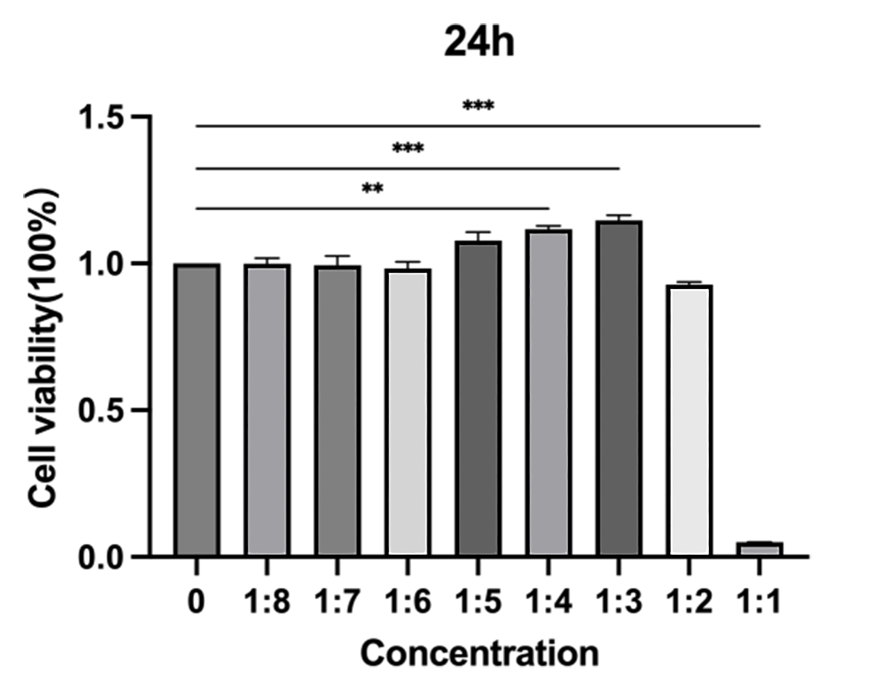


**Figure S3.** Cytotoxicity of the L-(CaP-ZnP)/SA nanocomposite hydrogel towards hDPSCs with a co-incubation time of 24h.

Error bars indicate mean ± standard deviation. Asterisks indicate statistically significant differences (**P < 0.01, and ***P < 0.001).


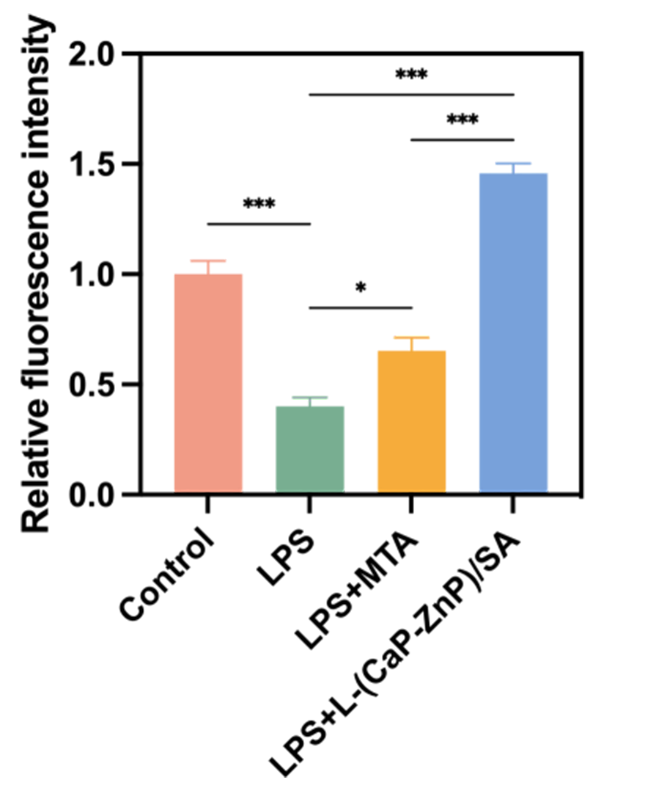


**Figure S4.** Quantitative calculation of Runx2 fluorescence intensity related to Figure 4C. Error bars indicate mean ± standard deviation. Asterisks indicate statistically significant differences (*P < 0.05, and ***P < 0.001).


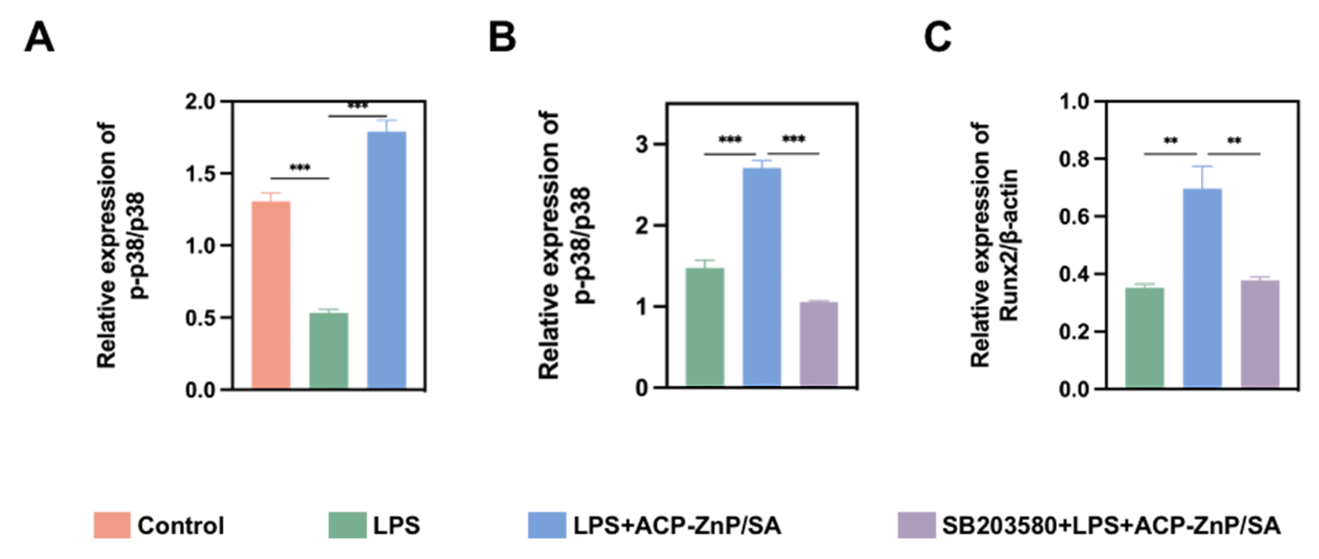


**Figure S5.** Semiquantitative protein expression related to Figure 5A-C. (A, B) Semiquantitative analysis of p-p38 and p38 protein expression. (C) Semiquantitative analysis of Runx2 protein expression. Error bars indicate mean ± standard deviation. Asterisks indicate statistically significant differences (**P < 0.01, and ***P < 0.001).


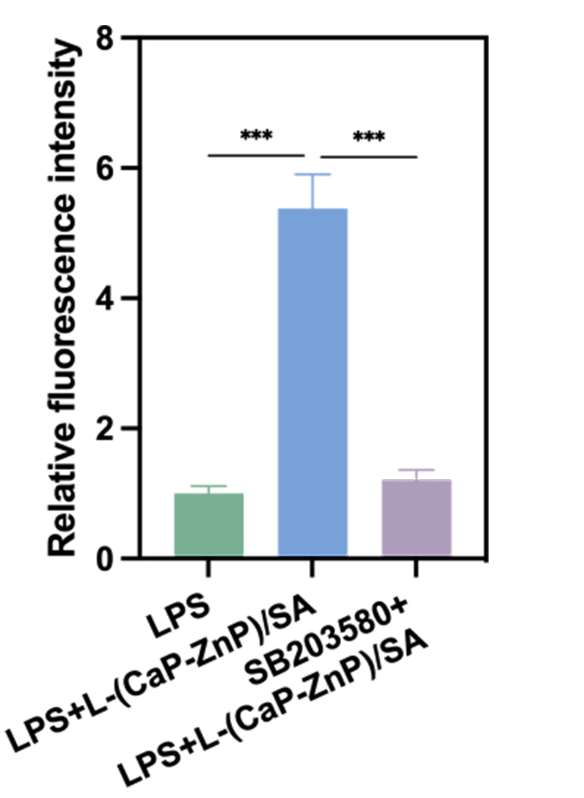


**Figure S6.** Quantitative calculation of Runx2 fluorescence intensity related to Figure 5H. Error bars indicate mean ± standard deviation. Asterisks indicate statistically significant differences (***P < 0.001).

**Table S1.** Primers of genes for qRT-PCR

| Gene name | Forward Premier (from 5’-3') | Reverse Premier（from 5’-3'） |
| --- | --- | --- |
| Human GAPDH | GGAGCGAGATCCCTCCAAAAT | GGCTGTTGTCATACTTCTCATGG |
| Human DSPP | AAAGTGGTGTCCTGGTGCAT | CCTGGATGCCATTTGCTGTG |
| Human DMP1 | TTCCTCTTTGAGAACATCAACCTG | ACTCACTGCTCTCCAAGGGT |
| Human BSP | CACTGGAGCCAATGCAGAAGA | TGGTGGGGTTGTAGGTTCAAA |
| Human ALP | ATCTTCCTGGGCGATGGGAT | CCACATATGGGAAGCGGTCC |
| Human Runx2 | CACTGGCGCTGCAACAAGA | CATTCCGGAGCTCAGCAGAATAA |
| Human OPN | GAAGTTCTGAGGAAAAGCAGC | GGACTTACTTGGAAGGGTCTCT |
| Human IL-1β | TGGCTTATTACAGTGGCAATGAGGATG | TGTAGTGGTGGTCGGAGATTCGTAG |
| Human IL-6 | GGTGTTGCCTGCTGCCTTCC | GTTCTGAAGAGGTGAGTGGCTGTC |
| Human TNF-α | CGTGGAGCTGGCCGAGGAG | AGGAAGGAGAAGAGGCTGAGGAAC |
| Mouse GADPH | AGGTCGGTGTGAACGGATTTG | GGGGTCGTTGATGGCAACA |
| Mouse IL-1β | ATGAAGGGCTGCTTCCAAAC | TCTCCACAGCCACAATGAGT |
| Mouse IL-6 | GGAGCCCACCAAGAACGATA | ACCAGCATCAGTCCCAAGAA |
| Mouse TNF-α | CTCATGCACCACCATCAAGG | ACCTGACCACTCTCCCTTTG |
| Mouse IL-10 | CTGGACAACATACTGCTAACCG | GGGCATCACTTCTACCAGGTAA |
| Mouse Arg-1 | TGGCTTGCGAGACGTAGAC | GCTCAGGTGAATCGGCCTTT |
